# Supplementary material
Source: publisher site journal article supplement (https://www.spandidos-publications.com/6645/downloadSupplementary)

Figure S1. High performance liquid chromatography chromatograms of LH and LT. Chromatograms of LH were recorded at (A) 214 and (B) 280 nm. Chromatograms of LT were recorded at (C) 214 and (D) 280 nm. Chromatograms of (E) formononetin and (F) lespedezaflavanone H were recorded at 214 nm.

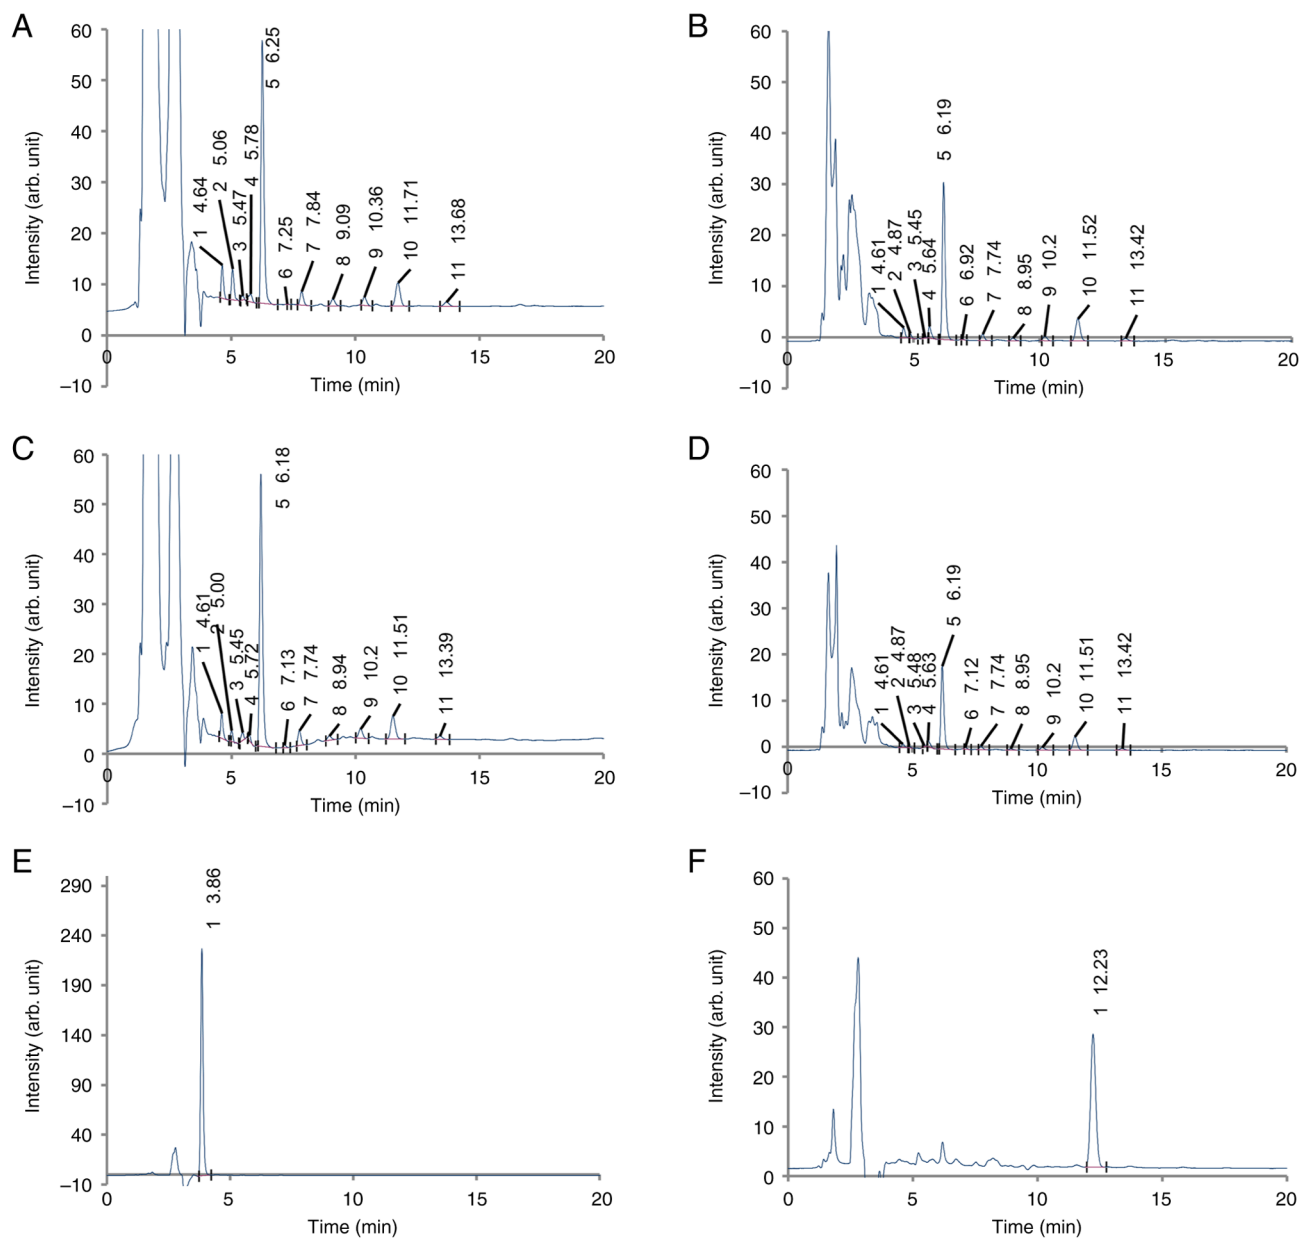

Supplement: Supplementary file 1 [file downloadSupplementary]
